# Supplementary material for: The patchwork loess of Central Asia: Implications for interpreting aeolian dynamics and past climate circulation in piedmont regions
Source: Copernicus journal article supplement (doi:10.5194/egusphere-2022-309), 2022-05-11
Supplement: Supplementary file 1 [file egusphere-2022-309-supplement.pdf]

## ***SUPPLEMENTARY INFORMATION***

### **The patchwork loess of Central Asia: Implications for interpreting aeolian dynamics and past climate circulation in piedmont regions**

Aditi K. Dave<sup>1,2\*</sup>, Lenka Lisá<sup>3</sup>, Giancarlo Scardia<sup>4</sup>, Saida Nigmatova<sup>5</sup>, Kathryn E. Fitzsimmons<sup>1,2</sup>

<sup>1</sup>*Research Group for Terrestrial Palaeoclimates, Max Planck Institute for Chemistry, Mainz, Germany*

<sup>2</sup>*Department of Geosciences, University of Tübingen, Schnarrenbergstrasse 94-96, 72076 Tübingen, Germany*

<sup>3</sup>*Institute of Geology, Czech Academy of Sciences, Prague, Czech Republic*

<sup>4</sup>*Instituto de Geociências e Ciências Exatas, Universidade Estadual Paulista, 13506-900 Rio Claro SP, Brazil*

<sup>5</sup>*Institute of Geological Sciences K. Satpaeva, Ministry for Education and Science of the Republic of Kazakhstan, Almaty, Kazakhstan*

*\*Present Address*

#### **1. Optically Stimulated Luminescence (OSL) dating**

##### **1.1. Sample preparation**

All the samples were processed and measured under subdued red-light conditions at the Institute of Geosciences, Johannes Gutenberg University and the Max Planck Institute for Chemistry (MPIC) in Mainz, Germany. Different grain size fractions were extracted by wet-sieving. However due to the lack of sufficient coarse grains (>45 µm), fine grain (4-11 µm) samples were prepared for OSL analysis using established protocols (Frechen et al., 1996). For the preparation of fine grain (4-11 µm) fraction – the <63 µm sediment was treated with 10% HCl followed by 10% H<sub>2</sub>O<sub>2</sub> to remove carbonates and organics respectively. The sediment was then treated with 0.1N sodium oxalate to remove clays. The 4-11 µm polymineral fraction was obtained from the bulk fraction (<63 µm) by settling using Stokes Law. This polymineral fine grain fraction was treated with 37% Hexafluorosilicic acid (H<sub>2</sub>SiF<sub>6</sub>) for 7 days to remove feldspar and washed with 10% HCl to remove fluoride precipitates to obtain fine grained (4-11 µm) quartz rich fraction (Jackson et al, 1976). All aliquots were prepared by depositing a suspension of 4-11 µm quartz fraction using acetone on 9.7 mm stainless steel discs. The purity of the quartz extracts for all samples was verified by the near background signal observed on IR stimulation of the sample after a given dose (c.19 Gy) for all the samples (Duller, 2003).

##### **1.2. Luminescence Measurements**

All luminescence measurements were made using an automated Risø TL-DA-20 reader equipped with a <sup>90</sup>Sr/<sup>90</sup>Y beta sources (Thomsen et al., 2006) calibrated to a dose rate of 0.095 ± 0.02 Gy/s. The sample was stimulated using IR LED (870 ± 30 nm, 300 mW/cm<sup>2</sup>) and blue LED (470±30 nm, 80 mW/cm<sup>2</sup>) and the emitted luminescence signal was detected by EMI 9235QA photomultiplier tube fitted with a 7.5 mm Hoya U-340 and a combination of Schott BG-39 and BG-3 filters to detect quartz and feldspar emissions respectively.

### 1.2.1. OSL dating of quartz

The natural and regenerative OSL decay curves obtained from fine-grained quartz from all five sites are sufficiently bright for reliable dating, although the intensity varies between samples. The generally high sensitivity observed in our samples contrasts with observations from sites further east in the Ili Basin (e.g., Li et al., 2018). The fine-grained quartz OSL decay curves show rapid decay within the initial 1 s of stimulation, indicating dominance of the rapidly bleached fast component (Fig. S2), and are suitable for luminescence dating.

Prior to any luminescence measurements, the thermal stability of the signals for equivalent dose ( $D_e$ ) determination was tested using the preheat plateau tests. The tests were performed on three discs each of two samples, A0021 and A0034, from profile PAN and ASH respectively at 180, 220, 240, 260 and 280°C (Fig. S3a). The results indicate an acceptable preheat plateau range between 240 to 260°C, hence a preheat of 260°C with a cut heat of 240°C for 10s was chosen for equivalent dose measurements in all fine grain quartz samples.

In order to negate any suspicion of feldspar contamination to the quartz-dominant OSL signal, an additional IR stimulation was added prior to every blue stimulation in the classic Single Aliquot Regenerative protocol (SAR; Murray and Wintle, 2000, 2003) - commonly referred to as DSAR (or Double-SAR; Banerjee et al, 2001). This approach was developed and commonly applied to obtain quartz-dominated post-IR OSL signal from a feldspar contaminated or polymineral fraction (Banerjee et al., 2001; Roberts and Wintle, 2001; Jain and Singhvi, 2001). Some studies have previously reported discrepancies between the  $D_e$  values evaluated from polymineral post IR-OSL signal compared to that from chemically purified quartz OSL signal (Zhang and Zhao, 2007; Zhang et al., 2007), which was related to IR exposure time and bleaching temperature utilised prior to blue stimulation in the DSAR protocol. Since in our study, we apply the DSAR protocol on pure quartz-rich grains, we do not expect any such discrepancy. Nevertheless, we optimise the performance as well as verify the applicability of the DSAR protocol on our samples by comparing the  $D_e$  obtained from a simple SAR protocol and that obtained from the DSAR protocol (at different IR bleaching times and temperatures) on a selected fine grain quartz sample (A0034).

Three discs each of sample A0034 was run for a combination of two different IR bleaching temperatures (50°C and 70°C) with two different IR bleaching times (40s and 100s) in the DSAR protocol (Table S3). The results obtained from these tests along with that obtained from running a simple SAR protocol are summarised in Fig.S3b. These results (as also observed by Zhang and Zhao, 2007) show that short IR exposure times of 40 to 100s seconds do not have much impact on the  $D_e$ 's, however it seems that a lower IR bleaching temperature of 50°C is more suitable for the application of the DSAR method to our samples. Hence, an IR stimulation of 100s at 50°C was chosen for all  $D_e$  measurements using DSAR protocol. To further check the applicability of the DSAR protocol, dose recovery tests was performed on 3-5 discs each of sample A0025 (PAN) and A0034 (ASH) using the DSAR (with an IR stimulation at 50°C for 100s) and a simple SAR protocol. After bleaching the samples with Blue LEDs at room temperature

for 80s, a radiation dose of c.47.5 Gy (close to their corresponding equivalent dose) was given to the samples. This laboratory dose was then measured using the SAR and DSAR protocol for both the samples and the resulting ratio of recovered laboratory dose to given dose was found to be within 10% of unity for both the samples irrespective of the applied protocols (Fig. S3c). This further affirms the suitability of the DSAR protocol for age determination of fine grain samples for our samples.

$D_e$  was determined from 16-22 aliquots each, of 19 fine grained quartz samples from four sites using the DSAR protocol (Table 1). The steps of the DSAR protocol are listed in Table S3. The robustness of the DSAR protocol on individual aliquots is tested with a set of intrinsic performance steps (recycling and recuperation) included after all the irradiation steps in every measurement. The recycling ratio (ratio of repeated dose to corresponding regenerative dose) was found to be within 10% of unity for all samples. While the recuperation ratio was <2% of the natural OSL signal for all aliquots, suggesting negligible thermal transfer of charge during OSL measurements. The dose response curves for all samples were fitted with a single saturating exponential function to obtain the best fit based on reduced chi square parameter. The early and late background subtraction method (Cunningham and Wallinga, 2010) for  $D_e$  determination was tested for all samples and no apparent change in  $D_e$  value was observed. Hence, we utilise the initial 0.8 s after subtracting the last 8s from the background OSL signal for calculation of the net OSL signal from each aliquot. The Central Age Model (Galbraith et al., 1999) was used to calculate the  $D_e$  for all samples.

Initial application of DSAR protocol on sample A0003 (site TAU, depth = 1 m) and A0038 (site MAL, depth = 1m) exhibited a flattening of the quartz OSL dose response curve indicating a near saturation of the quartz in nature. However, Timar-Gabor et al (2017) observed that the SAR dose response curve (DRC) constructed from the OSL fast component of fine grain quartz was described by a sum of two saturating exponential function and did not undergo saturation at high doses (>10000 Gy), even though it may have attained saturation with respect to its limit for dating under natural conditions. In order to ascertain that the quartz in our samples was in saturation and evaluate its saturation limit, we constructed the DRCs with a high dose range (c. upto 1500 Gy) for selected samples from the top and bottom of the profiles at site TAU (A0003, depth=1.5m; A0016, depth=7m) and MAL (A0037, depth=1m; A0050, depth=5.1m) respectively (Fig. S4). All four samples, yield an 'apparent' equivalent dose estimate of c.180-190 Gy (c.70 ka), which corresponds to the natural saturation values of fine grain quartz in this region (Table 1 and Fig. S4). Therefore all samples, below 1.5 m depth at TAU and below 1 m at MAL exhibit natural saturation (not laboratory) of the OSL quartz signal.

### **1.2.1. pIRIR dating of polyminerals**

In cases where apparent natural saturation of the fine-grained quartz-OSL signal was observed, elevated temperature post-infrared infrared stimulated luminescence (pIR-IRSL) dating of polymineral fine grains was undertaken (protocol outlined in Table S3; Theil et al, 2011). Based on the observations made by Thomsen et al (2008) and Murray et al (2009) and following the

work of Theil et al (2011), a pIR-IRSL protocol, with a preheat of 320°C for 60 s, followed by an IR stimulation at 50°C for 200s (IR<sub>50</sub>) and subsequent measurement of the pIR-IRSL signal at 290°C for 200 s (pIRIR<sub>290</sub>) was employed for all polymineral fine grain samples. A high temperature bleach at 325°C for 100 s was performed after each cycle to remove any residual charge. The  $D_e$  was evaluated using the net signal obtained from the initial 2.4 s of stimulation after subtraction of the background from the last c. 20 s. Since initial  $D_e$  measurements yielded a high natural dose, we constructed dose response curves extending over a high dose range (upto c. 3325 Gy, after Buylaert et al., 2012) to evaluate the  $D_e$  from polymineral fine grains. We performed this analysis on 3 aliquots each of the same set of samples from TAU (A0003 and A0016) and MAL (A0038 and A0050) as used in the quartz saturation experiment. The results are summarised in Fig. S5a,b. We assessed the closeness of the natural pIRIR signal to saturation by taking a ratio of the sensitivity corrected natural pIRIR signal to that obtained at c. 3225 Gy (Fig. S5c; after Avram et al., 2020). The  $D_e$ 's of all the samples fall between 88-92%, which is greater than  $2D_0$ .  $D_0$  refers to the characteristic dose obtained from the exponential function used to fit the dose response curve and  $2D_0$  refers to the dose value defined as 85% of maximum intensity for quartz OSL signal (Wintle and Murray, 2006). The  $2D_0$  value is recommended as the upper limit for quartz OSL dating as any uncertainty in the natural signal leads to a higher asymmetric uncertainty in the evaluated  $D_e$  values (Wintle and Murray, 2006). Since, no such equivalent criteria exists for pIRIR signals, we evaluate our samples based on the same criteria as quartz OSL. Therefore, the pIRIR<sub>290</sub> ages from TAU and MAL are considered as minimum ages and are summarised in Table S2.

### 1.3. Dose rate calculations

Environmental radiation dose rates were calculated from the U, Th and K concentrations obtained from bulk sediment samples using high resolution gamma spectrometry. Radionuclide concentrations were converted to dry dose rates using conversion factors of Guerin et al. (2011). The in-situ moisture in the samples varied between 5-12% and the saturated water content varied between 15-25% for all sample, hence the dose rates for all the samples were attenuated for moisture using in-situ water content of  $10 \pm 5\%$ . The cosmic ray component of the dose rates was determined from sample depths and uniform values for sediment density and site altitude, latitude and longitude, following Prescott and Hutton (1994). An alpha efficiency value (a-value) of  $0.038 \pm 0.002$  for fine grained quartz and  $0.086 \pm 0.004$  for poly mineral fine grains was utilised for all calculations (Rees-Jones, 1995). Given the size of fine grains (4-11), the contribution of internal alpha activity to dose rate is assumed to be negligibly small and ignored for all calculations. All dose rate calculations were performed using DRAC v.1.2 (Durcan et al., 2015). The radionuclide activities of U and Th were evaluated for possible disequilibrium and the results are presented in Table S5 and discussed in section 1.3.2.

#### 1.3.1. Water content of loess samples

The measured water content of most samples from the study sites varies from 5-12%. The sampling for luminescence dating samples was done during the summer of 2017 and there is a possibility that the measured *in situ* water content from the samples are underestimated due to evaporation following the cleaning of the section and storage of the samples. Water saturation experiments performed on sediments from the study sites suggests a maximum water saturation of  $20 \pm 5$  %. Hence, we utilise a water content of  $10 \pm 5$  % for all our dose rate calculations (Buylaert et al., 2015; Li et al., 2016b).

### 1.3.2. Disequilibrium

The radionuclide activities ( $\text{Bq.kg}^{-1}$ ) and daughter to parent ratios obtained by high resolution gamma spectrometry of  $^{238}\text{U}$  and  $^{232}\text{Th}$  decay chains from all the samples are summarised in Table S5. We investigate the secular disequilibrium assumption in the  $^{238}\text{U}$  decay chain by assessing the ratio of the activity concentrations of  $^{210}\text{Pb}$  to  $^{226}\text{Ra}$ .  $^{210}\text{Pb}$ : $^{226}\text{Ra}$  activity ratios indicate long term in-situ loss of  $^{222}\text{Rn}$  during burial time. The gamma dose rate for all the samples in this study was calculated assuming secular equilibrium. If the level of disequilibrium, as seen in the activity ratios of c.0.8 for  $^{210}\text{Pb}$ : $^{226}\text{Ra}$  in Table S5 had existed throughout the burial period, then the total dose rate would be c.2% lower than the ones calculated here (based on Olley et al, 1996). Such a change in dose rate would not affect the ages significantly and would be consistent within a  $2\sigma$  error limit.

## 2. Assumptions and Considerations: Age-depth modelling and mass accumulation rates

### 2.1. Optical ages for age depth modelling

A total of 33 loess sites, 14 sites from the Ili basin (including 3 sites from this study), 8 sites from other neighbouring basins in Arid Central Asia (ACA) and 11 representative sites from the Chinese loess Plateau (CLP) were chosen for this study. Table S6 contains a summary of the sites evaluated in this study as well as the references from where the optical ages have been obtained. To ensure a meaningful and robust comparison of MAR between the sites, only sites with a high resolution ( $\leq 1.5$  m) absolute chronology were selected. Luminescence ages based on quartz OSL and feldspar pIRIR signal were evaluated for a period of 60-0 kyr. We did not consider any luminescence ages based on  $\text{IR}_{50}$  signal as well as any radiocarbon ages for purposes of age-depth modelling.

### 2.2. Bacon modelling parameters

Bayesian age depth modelling was performed using R package Bacon (Blaauw and Christen, 2011) using optical ages from various sites summarised in Table S6. Bacon uses Bayesian statistics to reconstruct accumulation histories for deposits by combining absolute ages with prior information like accumulation rate and its variability over time (memory, derived from autocorrelation). Inverse accumulation rates (sedimentation times,  $\text{yrs.cm}^{-1}$ ) are estimated

from millions of Markov Chain Monte Carlo (MCMC) iterations, and these rates form the age depth model. The Inverse accumulation rates are controlled by prior information which have been set with default values: accumulation shape = 1.5 and accumulation mean = 20 for the gamma distribution and memory mean = 0.7 and memory strength = 4 for beta distribution, that describe the memory effects or autocorrelation of the inverse sedimentation rates. The thickness parameter in Bacon is set as 10 or 20 depending on the length of the profile being analysed. In cases where hiatuses have been identified by the authors in the respective publications, then these hiatuses were specified at given depths in the model. In case of hiatuses >10 ka years, the Bacon model was run to get individual age vs depth model for each section within the site.

The resulting modelled depths and weighted mean ages from the Bacon-derived age-depth models were used to evaluate sedimentation rates ( $\text{cm.k}^{-1}$ ; SR) according to the equation:

$$\text{SR} = (d_2 - d_1) / (t_2 - t_1)$$

where  $d_2$ ,  $d_1$  and  $t_2$ ,  $t_1$  refer to consecutive depths and corresponding modelled mean ages respectively.

Comparison of past dust records from different loess deposits with each other and with other global dust flux records from ice cores and ocean sediments requires the evaluation of loess mass accumulation rates (MAR,  $\text{gm}^{-2}\text{a}^{-1}$ ), which are computed using the equation:

$$\text{MAR} = \text{SR} \times \rho_{\text{dry}} \times f_{\text{eol}}$$

where SR refers to sedimentation rate ( $\text{m/a}$ ),  $\rho_{\text{dry}}$  is the dry bulk density ( $\text{gm}^{-3}$ ) and  $f_{\text{eol}}$  refers to the sediment fraction that is aeolian in nature (Kohfeld and Harrison, 2000);  $f_{\text{eol}} = 1$  for all calculations, since we assume that loess is almost entirely aeolian in nature. Dry bulk density for sediments varies with nature of sediment, depth and grain size; the systematic use of these parameters in previously published literature is based on approximate estimates from the region or on values from neighbouring loess sites. Furthermore, information on down-section variation of dry bulk density in loess is sparse and usually a constant value is assumed for an entire profile. In all the sites evaluated in this study, most studies use dry bulk density values based on approximate regional estimates, which vary from  $1.2 \text{ gm}^{-3}$  (in palaeosols) upto  $1.8 \text{ gm}^{-3}$  (in loess) depending on the site and region (ACA: Jia et al., 2018; Wang et al., 2019; Li et al., 2019b; CLP: Kohfeld and Harrison, 2003). This variation can alone add an uncertainty of upto 20% to the MAR values at the site. We keep this in mind while drawing conclusions based on comparison of MAR's between different sites.

Sites where, high deposition occurs during short time intervals (e.g. XEBLK-Li et al, 2016, ASH- this study) can lead to a modelled dataset with high frequency variations (noise) around the mean value. In such cases for simplicity and better representation, we use a 10-point running average through the dataset. Our evaluation of MAR's from luminescence ages for most sites agrees ( $1\sigma$  uncertainty) with that evaluated by the respective authors of the original work. The differences (where applicable) occurs due to the statistical approach utilised for age-depth modelling.



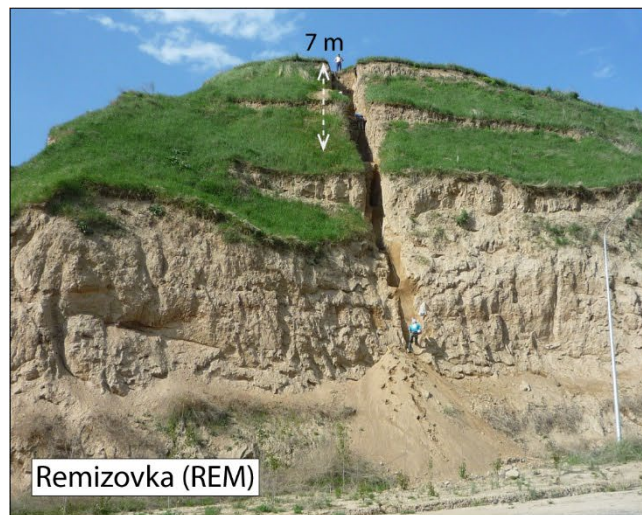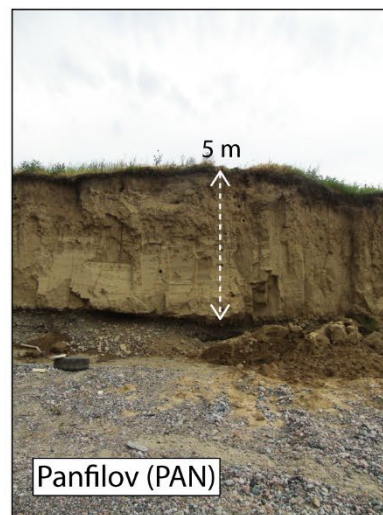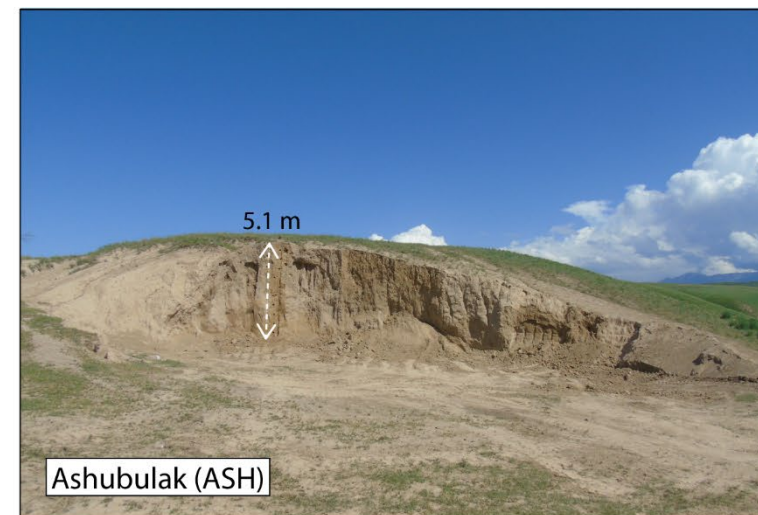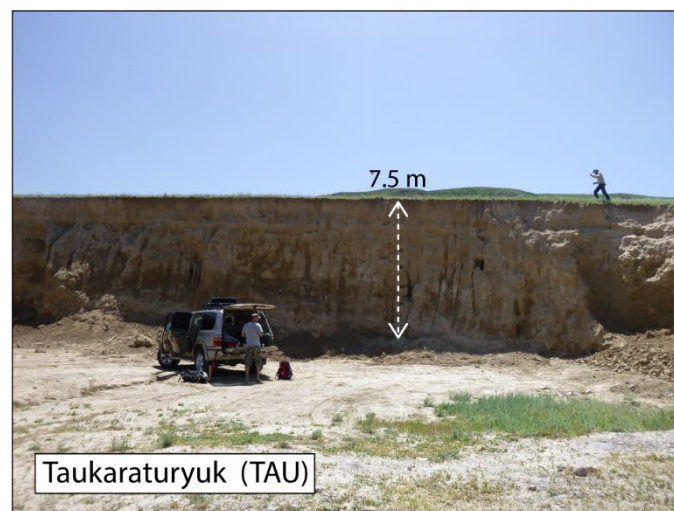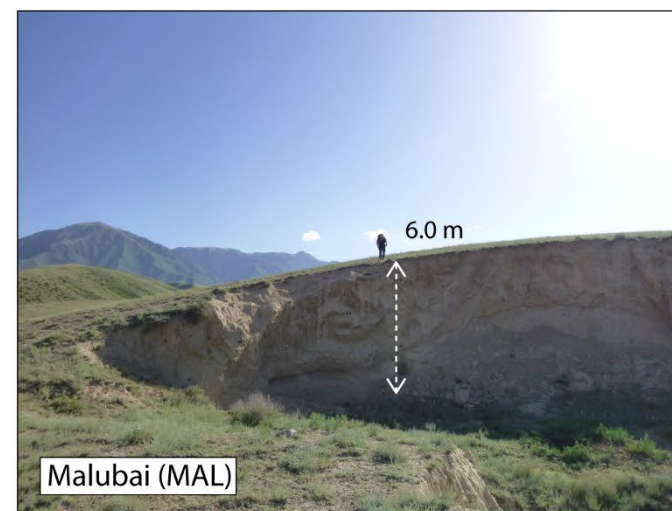

Fig. S1. Loess sites under study in the Ili basin of SE Kazakhstan.

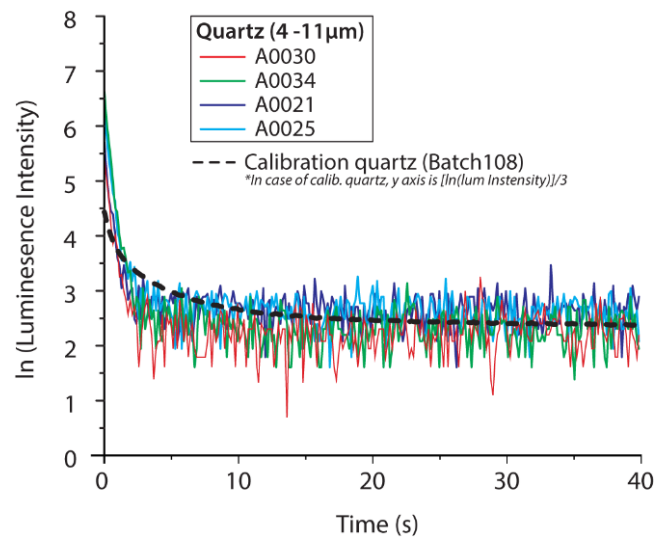

Fig. S2. Comparison of quartz OSL signal behaviour of fine grain calibration quartz with that from Central Asian loess sites, PAN and ASH.



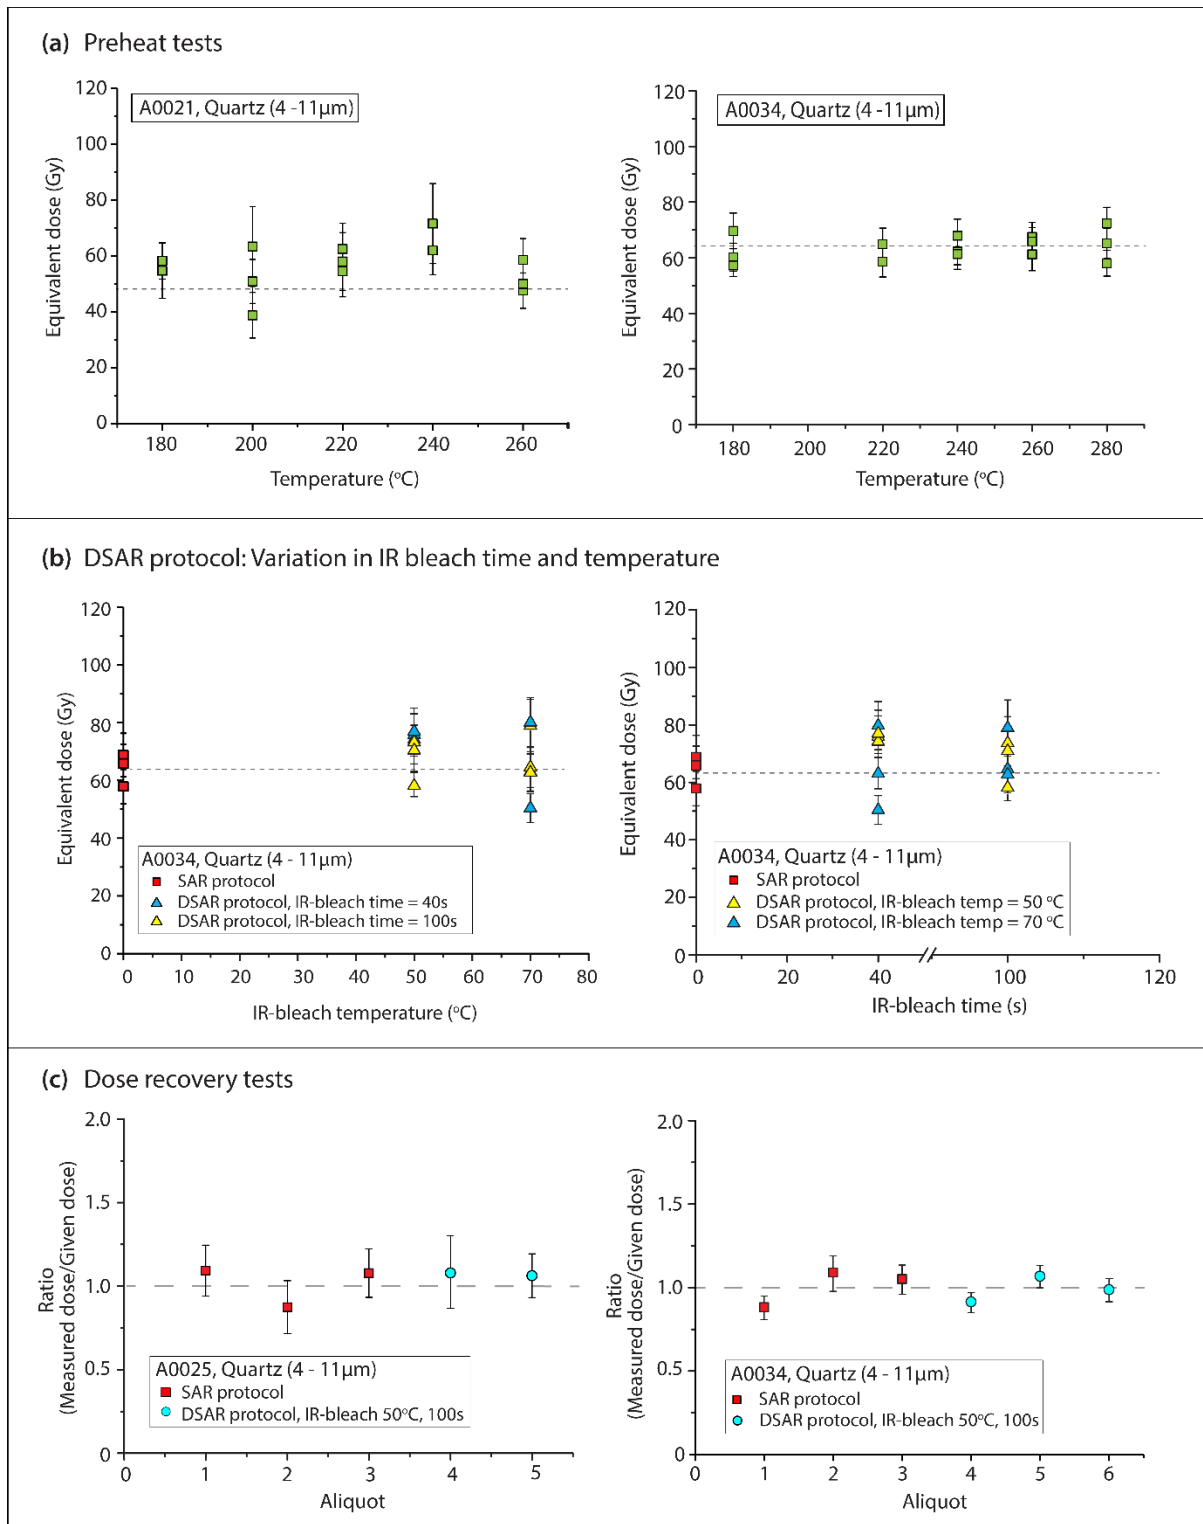

Fig. S3. (a) Dependence of equivalent dose ( $D_e$ ) on preheat temperature during SAR protocols for selected samples A0021 (PAN) and A0034 (ASH) (b) Optimisation of the DSAR protocol: Variation in  $D_e$  with varying IR bleach temperature and IR bleach time respectively for sample A0034 (c) Dose recovery tests on selected samples (A0025 and A0034) using both SAR and DSAR protocols.

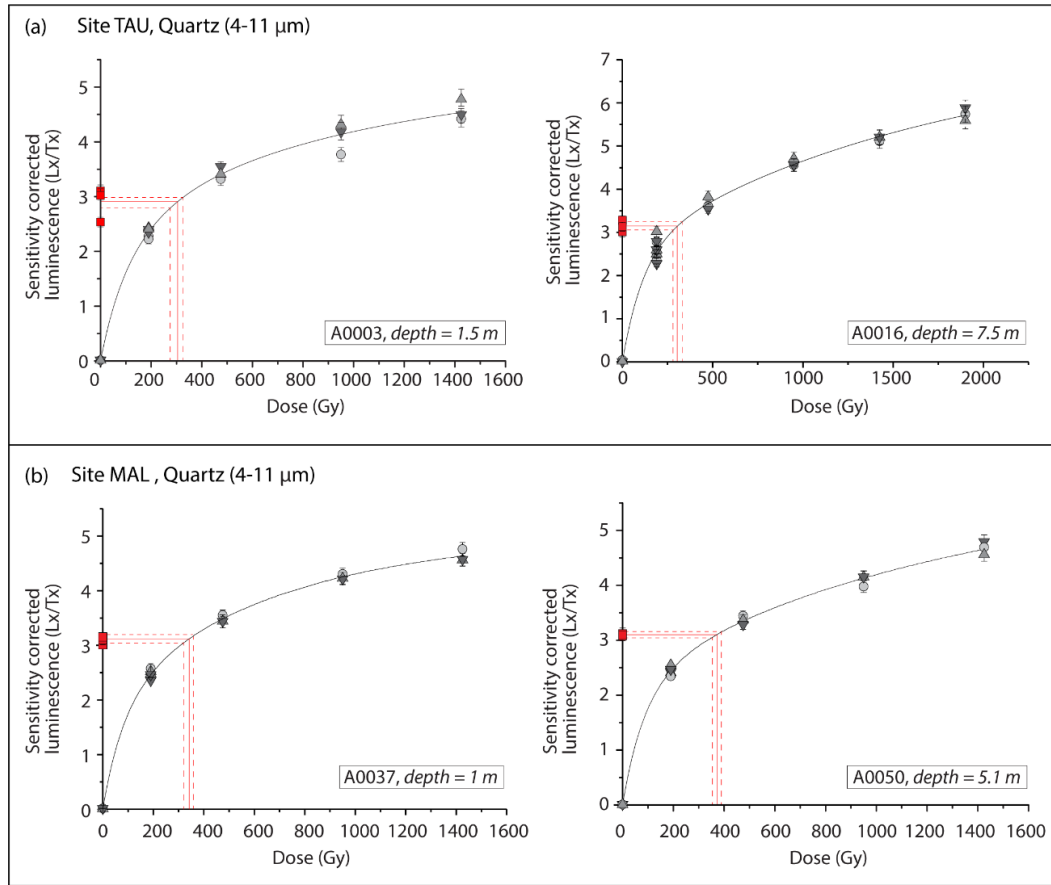

Fig. S4. Dose response curves (DRC) constructed at high doses (upto c.1500 Gy) in fine grain quartz from (a) site TAU and (b) site MAL. The DRCs were fitted using the sum of two saturating exponentials.

(a) Site TAU

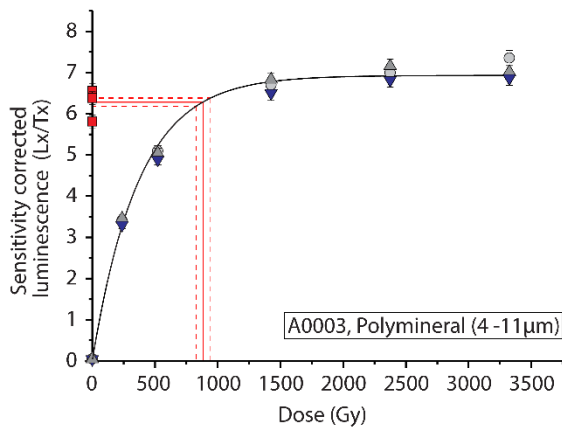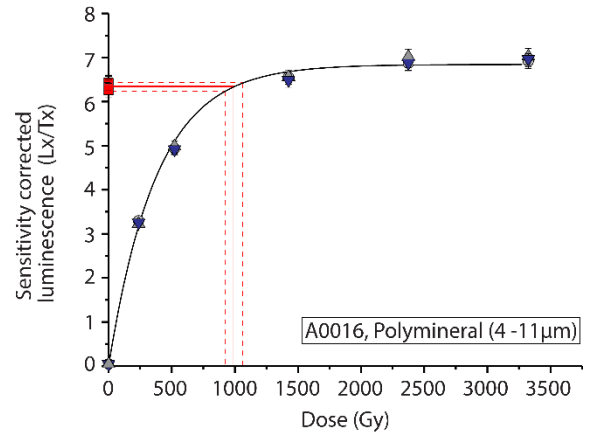

(b) Site MAL

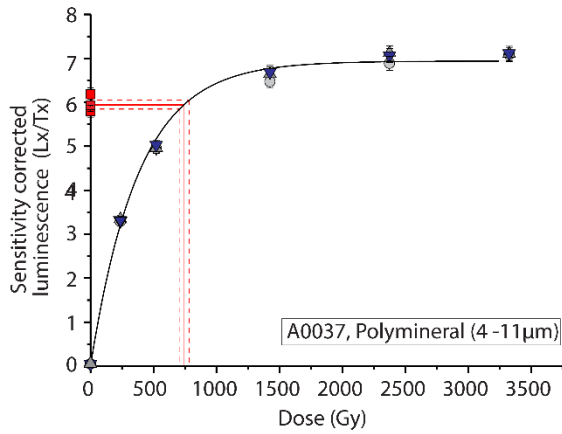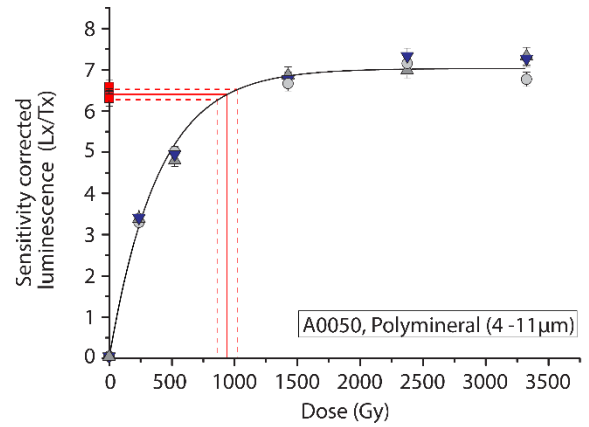

(c)

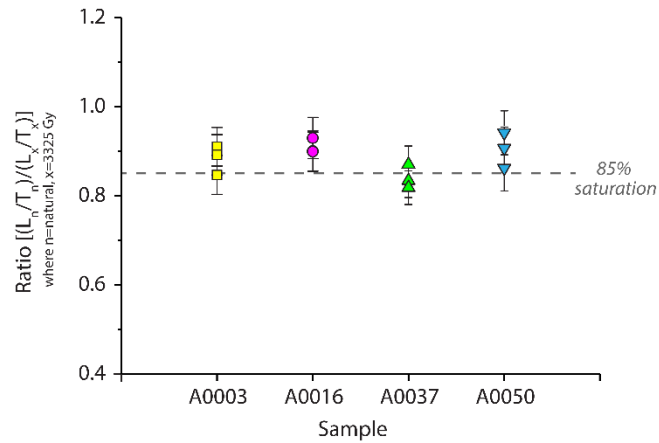

Fig. S5. Dose response curve for fine-grained polymineral samples at high doses ( $>3000 \text{ Gy}$ ) for selected samples from two sites: (a) site TAU, samples A0003 (depth 1.5 m) and A0016 (depth 7.5 m); and (b) site MAL, samples A0037 (depth 1 m) and A0050 (depth 5.1 m). (c) Ratio of natural sensitivity-corrected pIRIR<sub>290</sub> signal to that emitted at a dose of c. 3325 Gy for the aforementioned samples, taken from the top and bottom of the TAU and MAL sections.

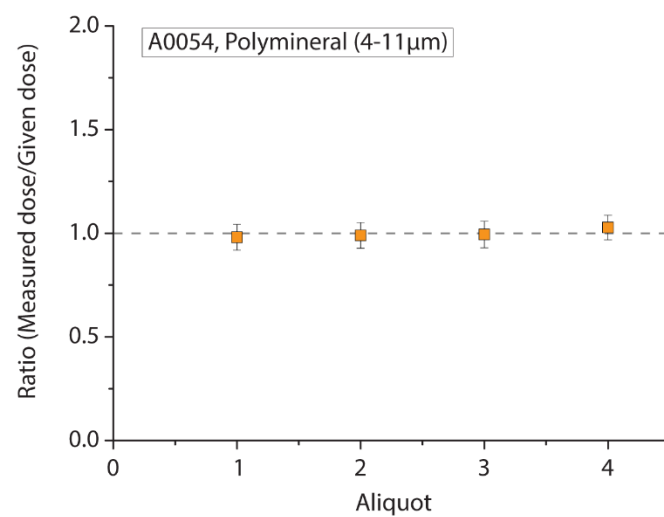

Fig. S6. Dose recovery tests for fine grained polymineral sample A0054 from site MAL.



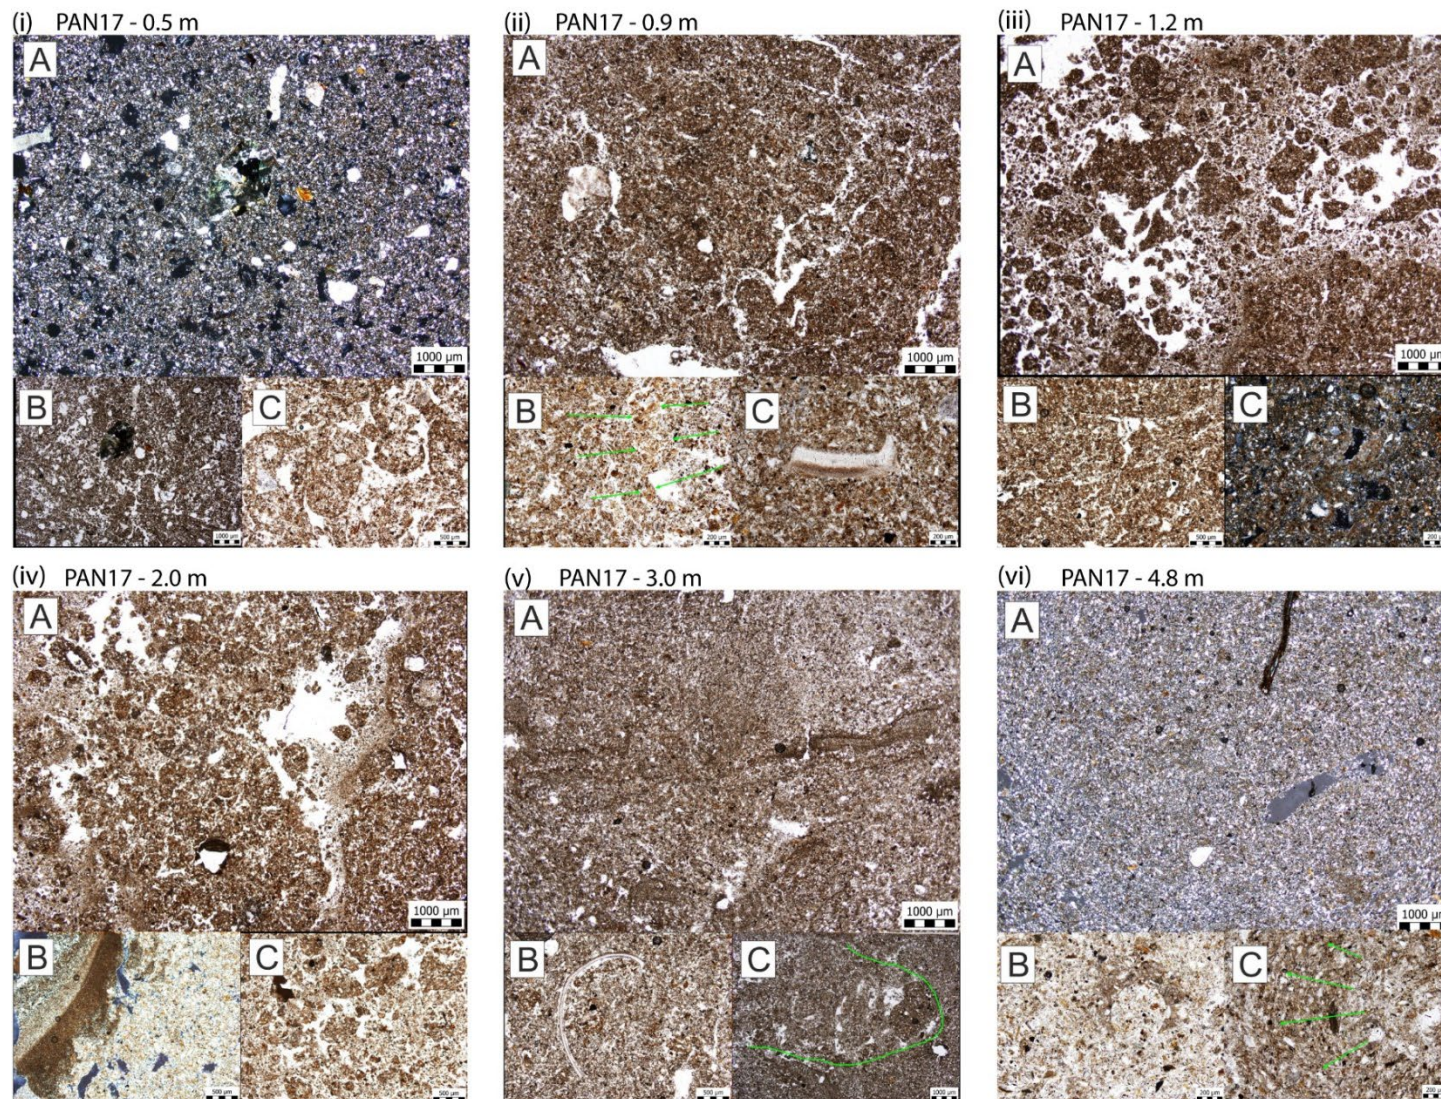

Fig. S7. Microphotographs of thin sections from profile PAN (i) PAN17-0.5 m: **A)** unsorted matrix (XPL). **B)** same photograph showing highly bioturbated matrix (PPL). **C)** excremental features (PPL).

(ii) PAN17-0.9 m: **A)** matrix with cracks, possibly a product of bioturbation (PPL). **B)** decomposed organic matter, probably root relict (PPL). **C)** shell fragment (PPL).

(iii) PAN17-1.2 m: **A)** Granular microstructure – problem in sampling? (PPL). **B)** passage features (PPL). **C)** vughs with hypocoating preserved within the aggregate (XPL).

(iv) PAN17-2.0 m: **A)** matrix rich in depletion features and redeposited soil crusts (PPL). **B)** Soil crust (XPL). **C)** silty aggregate fragments (PPL).

(v) PAN17-3.0 m: **A)** unsorted material with common presence of redeposited soil crusts (PPL). **B)** shell fragment (PPL). **C)** bioturbation (PPL).

(vi) PAN17-4.8 m: **A)** homogenous silty loam influenced by bioturbation (XPL). **B)** rare hypocoating (XPL). **C)** bioturbation (PPL).



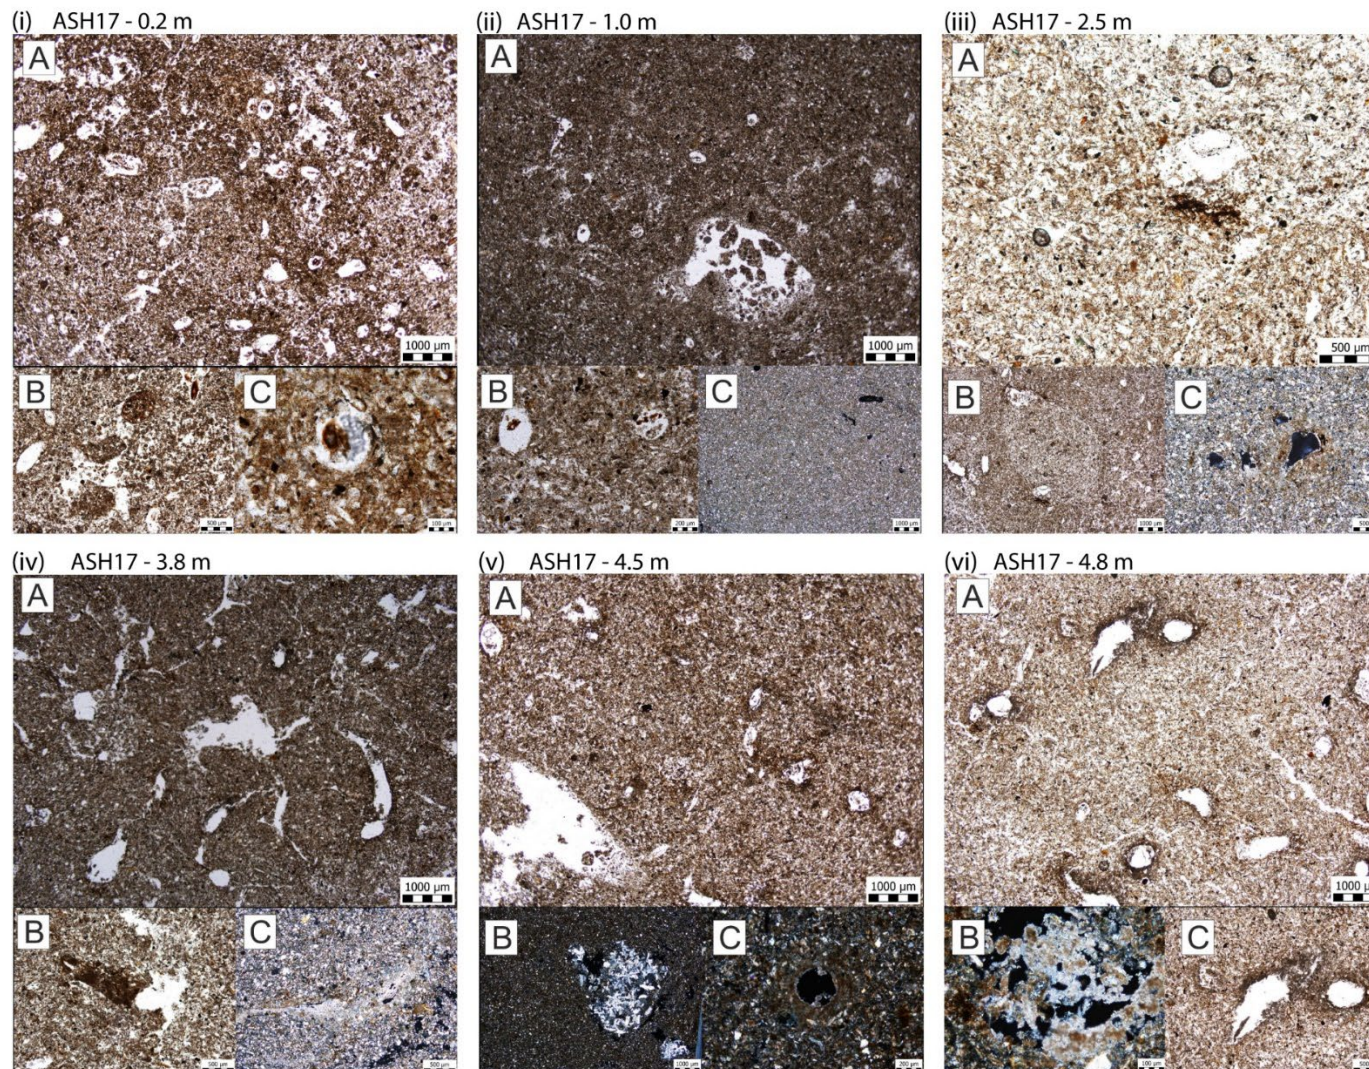

**Fig. S8.** Microphotographs of thin sections from profile ASH **(i)** ASH17-0.2 m: **A**) matrix influenced strongly by bioturbation (PPL). **B**) excremental features (PPL). **C**) multi-layered hypocoating with the root in the centre (PPL).

**(ii)** ASH17-1.0 m: **A**) homogenous silty loam influenced by bioturbation (PPL). **B**) Fresh roots preserved (PPL). **C**) homogeneous sorted matrix (XPL).

**(iii)** ASH17-2.5 m: **A**) dark brown concentrations of decomposed organic matter (PPL). **B**) calcium carbonate impregnations (XPL). **C**) hypocoating (XPL).

**(iv)** ASH17-3.8 m: **A**) homogeneous silty loam matrix with common bioturbation features (PPL). **B**) rare presence of soil crusts (PPL). **C**) calcium carbonate infill with possible presence of lublinitite (XPL).

**(v)** ASH17-4.5 m: **A**) homogeneous silty loam matrix with common vughs and hypocoatings (PPL). **B**) gypsum crystals (XPL). **C**) calcium carbonate hypocoating (XPL).

**(vi)** ASH17-4.8 m: **A**) homogenous silty loam matrix with common vughs and hypocoatings (PPL). **B**) lublinitite void infills (XPL). **C**) calcium carbonate hypocoating (XPL).



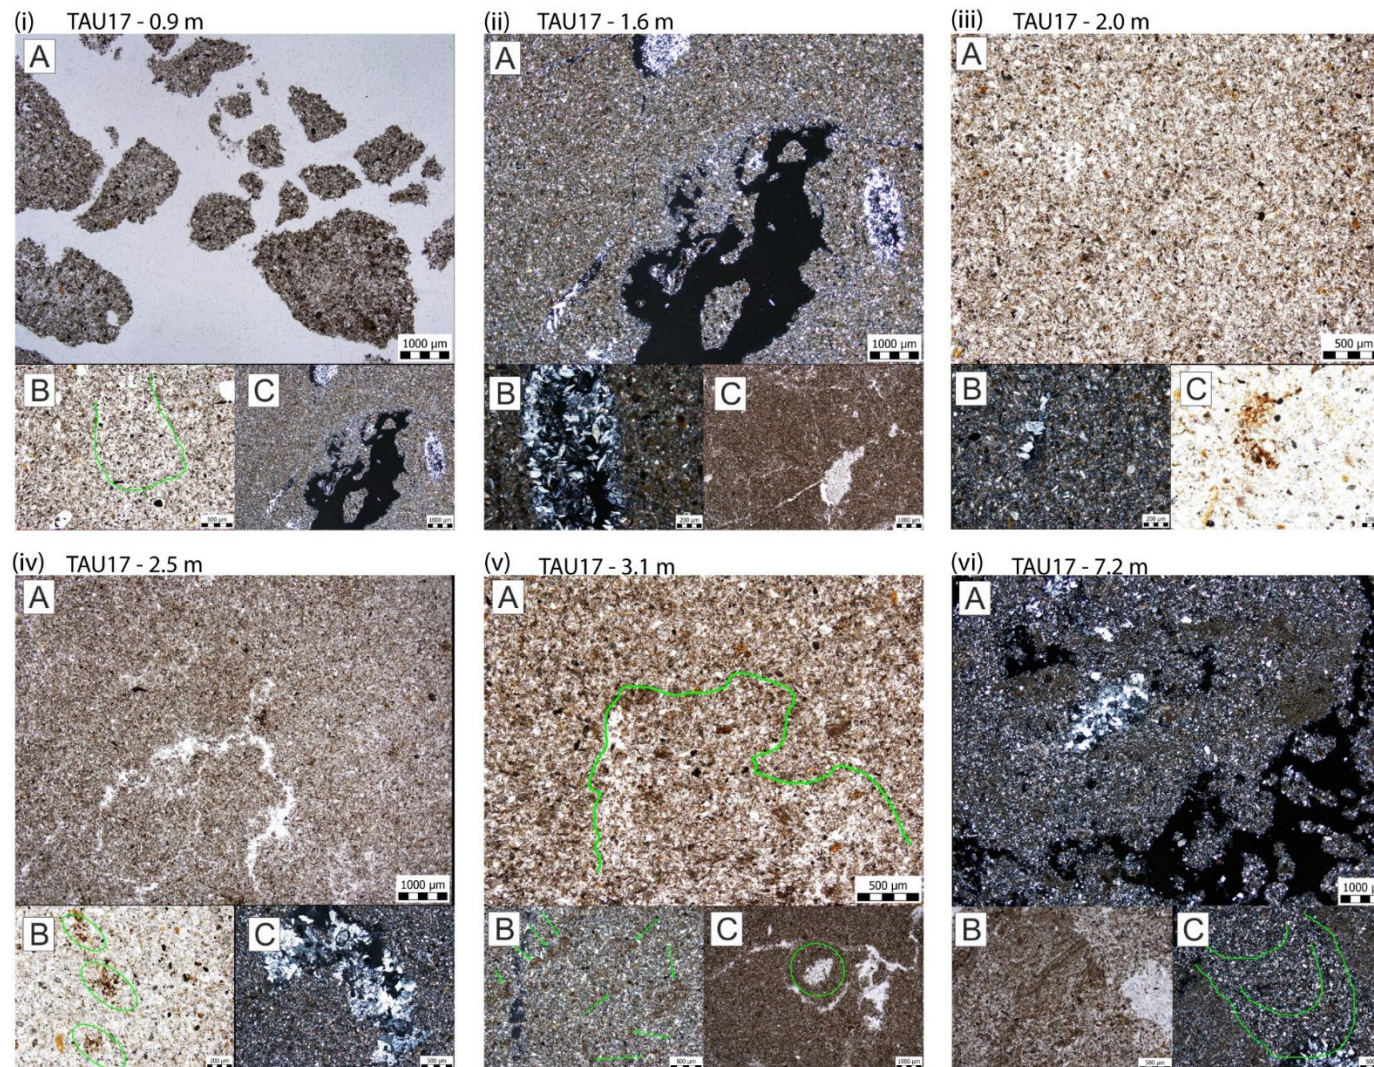

Fig. S9. Microphotographs of thin sections from site TAU (i) TAU17-0.9 m: **A**) granular microstructure – possibly a sampling error (PPL). **B**) passage features (PPL). **C**) vughs preserved within the aggregates and root fragments (*in green*) (PPL).

(ii) TAU17-1.6 m: **A**) homogeneous silty loam influenced by gypsum crystal growth (XPL). **B**) calcium carbonate impregnations (XPL). **C**) cracks as a result of crystal growth (PPL).

(iii) TAU17-2.0 m: **A**) homogeneous silty loam influenced by gypsum crystal growth (XPL). **B**) gypsum crystal growth (XPL). **C**) rare decomposed organic matter (PPL).

(iv) TAU17-2.5 m: **A**) homogenous silty loam matrix with cracks (XPL). **B**) decomposed organic matter (PPL). **C**) gypsum crystal growth (XPL).

(v) TAU17-3.1 m: **A**) homogeneous silty loam influenced by bioturbation (PPL). **B**) silty aggregates (XPL). **C**) subangular blocky microstructure and gypsum crystal growth (*green circle*) (PPL).

(vi) TAU17-7.2 m: **A**) packing voids through unsorted matrix rich in soil crust and gypsum crystal growth (XPL). **B**) soil crusts and gypsum crystal growth (PPL). **C**) bioturbation (XPL).



Table S1. Micromorphological description of selected samples from three loess sites (PAN, ASH and TAU) in the Ili basin, SE Kazakhstan.

| Site           | Micromorphological description of selected samples |                                                                                                                                                                         |                                                 |                                                                                                                                       |                                               |                                                |                                                                                |                                                                                                |
|----------------|----------------------------------------------------|-------------------------------------------------------------------------------------------------------------------------------------------------------------------------|-------------------------------------------------|---------------------------------------------------------------------------------------------------------------------------------------|-----------------------------------------------|------------------------------------------------|--------------------------------------------------------------------------------|------------------------------------------------------------------------------------------------|
|                | Selected Sample (depth, m)                         | Fabric                                                                                                                                                                  |                                                 |                                                                                                                                       |                                               |                                                |                                                                                | Pedogenic features                                                                             |
|                |                                                    | Microstructure                                                                                                                                                          | Matrix                                          | Grain size description                                                                                                                | Minerals                                      | Roundness                                      | Other features                                                                 |                                                                                                |
| Panfilov (PAN) | 0.5 m<br>Fig. S7(i)                                | Complex microstructure (combination of granular and channel) with the simple packing, compound packing voids, channels and vughs.                                       | Colour - Dark brown to brown; Bf - crystallitic | Unsorted with double spaced porphyric distribution; GSD corresponds to sandy loam with $c/f_{(50\mu m)} = 60:40$                      | Qzt, Ptg, aluminosilicate and opaque minerals | SR; some angular to sub-angular rock fragments | Decomposed organic matter, relicts of fresh roots                              | Passage and excremental features                                                               |
|                | 0.9 m<br>Fig. S7(ii)                               | Complex microstructure with the cracks, vughs and channels.                                                                                                             | Colour - brown; Bf - crystallitic               | Moderately sorted with porphyric distribution; GSD corresponds to silty loam with $c/f_{(50\mu m)} = 40:60$                           | Qzt, Ptg, aluminosilicate and opaque minerals | SR; some angular rock fragments                | Decomposed organic matter, relicts of fresh roots, presence of shell fragments | Passage features, hypocoatings                                                                 |
|                | 1.2 m<br>Fig. S7(iii)                              | Presence of granular microstructure (problematic sampling issue?). Preserved pores most likely reflect the complex packing void; few vughs preserved within aggregates. | Colour - grey brown; Bf - crystallitic          | Well sorted with porphyric distribution; GSD corresponds to silty loam with $c/f_{(50\mu m)} = 30:70$                                 | Qzt, Ptg, aluminosilicate and opaque minerals | SR                                             | Decomposed organic matter                                                      | Rare passage features, hypocoatings                                                            |
|                | 2.0 m<br>Fig. S7(iv)                               | Complex microstructure with complex packing voids and chambers; few vughs and channels are also preserved.                                                              | Colour - grey brown to brown, Bf - crystallitic | Moderately sorted to unsorted with double spaced porphyric distribution; GSD corresponds to silty loam with $c/f_{(50\mu m)} = 40:60$ | Qzt, Ptg, aluminosilicate and opaque minerals | SR                                             | Decomposed organic matter                                                      | Passage features, depletion features, calcium carbonate impregnations, redeposited soil crusts |

|                 |                      |                                                                                                                                    |                                                              |                                                                                                                                                                                       |                                               |    |                                            |                                                                                           |
|-----------------|----------------------|------------------------------------------------------------------------------------------------------------------------------------|--------------------------------------------------------------|---------------------------------------------------------------------------------------------------------------------------------------------------------------------------------------|-----------------------------------------------|----|--------------------------------------------|-------------------------------------------------------------------------------------------|
|                 | 3.0 m<br>Fig. S7(v)  | Complex microstructure with the complex packing void, few vughs and cracks                                                         | Colour - Patchy brown and dark brown phases; Bf-crystallitic | Unsorted with the porphyric double spaced distribution; GSD corresponds to the sandy loam with $c/f_{(50\mu m)}=60:40$ ; presence of silty aggregates (compose 10% of sandy fraction) | Qzt, Ptg, aluminosilicate and opaque minerals | SR | Decomposed organic matter                  | Passage features, calcium carbonate impregnations, fragmented and redeposited soil crusts |
|                 | 4.8 m<br>Fig. S7(vi) | Complex microstructure with the few vughs, chambers and and channels, with a low amount of pores.                                  | Colour - grey brown; Bf-crystallitic                         | Well sorted with the porphyric distribution and GSD corresponds to the silty loam with $c/f_{(50\mu m)}=60:40$ ; presence of silty aggregates (compose 10% of sandy fraction)         | Qzt, Ptg, aluminosilicate and opaque minerals | SR | Decomposed organic matter                  | Rare passage features                                                                     |
| Ashubulak (ASH) | 0.2 m<br>Fig. S8(i)  | Complex microstructure (combination of granular and channel) simple packing voids, compound packing voids, channels and few vughs. | Colour - dark brown; Bf-crystallitic                         | Well sorted with porphyric distribution; GSD correspond to silty loam with $c/f_{(50\mu m)}=30:70$ .                                                                                  | Qzt, Ptg, aluminosilicate and opaque minerals | SR | Decomposed organic matter                  | Passage features, excremental features, partial and multilayered hypocoating.             |
|                 | 1.0 m<br>Fig. S8(ii) | Complex microstructure with the complex packing void, few cracks, vughs and channels                                               | Colour - grey brown; Bf-crystallitic                         | Well sorted with porphyric distribution and GSD corresponds to the silty loam with $c/f_{(50\mu m)}=30:70$                                                                            | Qzt, Ptg, aluminosilicate and opaque minerals | SR | Decomposed organic matter                  | Passage features                                                                          |
|                 | 2.5m<br>Fig. S8(iii) | Channel microstructure with channels, vughs and chambers                                                                           | Colour- brown with local dark brown                          | Moderately sorted with porphyric distribution and GSD corresponds to silty                                                                                                            | Qzt, Ptg, aluminosilicate and opaque minerals | SR | Decomposed organic matter as black dotting | Passage features, calcium carbonate illuviation, hypocoating                              |

|                     |                      |                                                                                                                                                                    |                                      |                                                                                                               |                                                       |                            |                                                                                 |                                                                                    |
|---------------------|----------------------|--------------------------------------------------------------------------------------------------------------------------------------------------------------------|--------------------------------------|---------------------------------------------------------------------------------------------------------------|-------------------------------------------------------|----------------------------|---------------------------------------------------------------------------------|------------------------------------------------------------------------------------|
|                     |                      |                                                                                                                                                                    | patches; Bf-crystallitic             | loam with $c/f_{(50\mu m)} = 30:70$                                                                           |                                                       |                            |                                                                                 |                                                                                    |
|                     | 3.8 m<br>Fig. S8(iv) | Complex microstructure with the complex packing void, cracks, vughs and channels. Pores are very common                                                            | Colour - grey brown; Bf-crystallitic | Well sorted with porphyric distribution; GSD corresponds to the silty loam with the $c/f_{(50\mu m)} = 30:70$ | Qzt, Ptg, aluminosilicate and opaque minerals         | SR                         | Decomposed organic matter, relicts of fresh roots, rare presence of soil crusts | Passage features, hypocoating, infilling                                           |
|                     | 4.5 m<br>Fig. S8(v)  | vughy/channel microstructure with the vughs and channels.                                                                                                          | Colour - grey brown; Bf-crystallitic | Well sorted with the porphyric distribution; GSD corresponds to the silty loam with $c/f_{(50\mu m)} = 30:70$ | Qzt, Ptg, aluminosilicate and opaque minerals         | SR                         | Decomposed organic matter, relicts of fresh roots                               | Rare passage features, hypocoating, gypsum crystal growth                          |
|                     | 4.8 m<br>Fig. S8(vi) | Channel microstructure with the vughs and channels.                                                                                                                | Colour - grey brown; Bf-crystallitic | Well sorted with the porphyric distribution; GSD corresponds to the silty loam with $c/f_{(50\mu m)} = 30:70$ | Qzt, Ptg, aluminosilicate and opaque minerals         | SR                         | Decomposed organic matter, occasional relicts of fresh roots                    | Rare passage features, hypocoating, lignite void infillings, gypsum crystal growth |
| Taukaraturyuk (TAU) | 0.9 m<br>Fig. S9(i)  | Granular microstructure (product of problematic sampling?). Preserved pores may be because of the complex packing void; few vughs preserved within the aggregates. | Colour - grey brown; Bf-crystallitic | Well sorted with the porphyric distribution; GSD corresponds to the silty loam with $c/f_{(50\mu m)} = 30:70$ | Qzt, Ptg, aluminosilicate and opaque minerals         | SR                         | Decomposed organic matter                                                       | Rare passage features                                                              |
|                     | 1.6 m<br>Fig. S9(ii) | Complex microstructure with the chambers and cracks.                                                                                                               | Colour - grey brown; Bf-crystallitic | Well sorted with porphyric distribution and GSD corresponds to silty loam with $c/f_{(50\mu m)} = 30:70$      | Qzt, Ptg, aluminosilicate and opaque minerals, gypsum | SR, except gypsum crystals | Decomposed organic matter                                                       | Gypsum crystallisation                                                             |

|  |                       |                                                                                                                                              |                                                                |                                                                                                                                                                                                                    |                                                                       |                            |                                                                     |                                                                                                                                       |
|--|-----------------------|----------------------------------------------------------------------------------------------------------------------------------------------|----------------------------------------------------------------|--------------------------------------------------------------------------------------------------------------------------------------------------------------------------------------------------------------------|-----------------------------------------------------------------------|----------------------------|---------------------------------------------------------------------|---------------------------------------------------------------------------------------------------------------------------------------|
|  | 2.0 m<br>Fig. S9(iii) | Massive microstructure with only rare vughs                                                                                                  | Colour - grey brown; Bf - crystallitic                         | Well sorted with the porphyric distribution and GSD corresponds to the silty loam with $c/f_{(50\mu m)} = 30:70$ .                                                                                                 | Qzt, Ptg, aluminosilicate and opaque minerals, gypsum                 | SR, except gypsum crystals | Decomposed organic matter                                           | Gypsum crystallisation                                                                                                                |
|  | 2.5 m<br>Fig. S9(iv)  | Massive to crackly microstructure with only rare vughs                                                                                       | Colour - grey brown; Bf - crystallitic                         | Well sorted with the porphyric distribution and GSD corresponds to the silty loam with $c/f_{(50\mu m)} = 30:70$ .                                                                                                 | Qzt, Ptg, aluminosilicate and opaque minerals, gypsum                 | SR, except gypsum crystals | Decomposed organic matter as black dotting, brownish organic matter | Occasional gypsum crystallisation                                                                                                     |
|  | 3.1 m<br>Fig. S9(v)   | Subangular blocky microstructure with the complex packing void, few vughs and channels.                                                      | Colour - grey brown; Bf - crystallitic                         | Well sorted with porphyric distribution and GSD correspond to the silty loam with $c/f_{(50\mu m)} = 60:40$ ; presence of silty aggregates (compose up to 10 % of the sandy fraction)                              | Qzt, Ptg, aluminosilicate and opaque minerals, gypsum                 | SR, except gypsum crystals | Decomposed organic matter                                           | Rare passage features and gypsum crystal growth                                                                                       |
|  | 7.2 m<br>Fig. S9(vi)  | Subangular blocky microstructure with the complex packing void, chambers, plates as a part of fragmented soil crusts, few vughs and channels | Colour - Patchy brown and dark brown phases; Bf - crystallitic | Unsorted with porphyric double spaced distribution and GSD correspond to the sandy loam with the $c/f_{(50\mu m)} = 60:40$ ; coarse fraction mainly composed of soil fragments, gypsum crystals and rock fragments | Qzt, Ptg, aluminosilicate and opaque minerals, gypsum, rock fragments | SR, except gypsum crystals | Decomposed organic matter                                           | Passage features, calcium carbonate illuviation and local impregnations, fragmented and redeposited soil crust, gypsum crystal growth |

\*Terms: Qzt – quartz; SR – subrounded; Bf - Bifringence; Ptg - ; GSD - Grain size distribution

Table S2. Equivalent dose, dose rate and post IR<sub>50</sub>IRSL<sub>290</sub> ages on polymineral fine grains from the Ili basin study sites. The term  $n_e/n_t$  refers to the total number of accepted discs to the total number of discs measured

| Site                | Sample No.         | Depth (m)  | Moisture attenuated dose rate (Gy/ka) |           |           | Cosmic (Gy/ka) | Total Dose Rate (Gy/ka) | $n_e/n_t$ | $D_e$ (Gy)    | Age (ka)     |
|---------------------|--------------------|------------|---------------------------------------|-----------|-----------|----------------|-------------------------|-----------|---------------|--------------|
|                     |                    |            | Alpha                                 | Beta      | Gamma     |                |                         |           |               |              |
| Taukaraturyuk (TAU) | A003               | 1.5 ± 0.05 | 1.1 ± 0.1                             | 2.0 ± 0.1 | 1.2 ± 0.1 | 0.20 ± 0.02    | 4.5 ± 0.2               | 8/12      | 896.6 ± 54.0  | 197.6 ± 21.2 |
|                     | A007               | 3.5 ± 0.05 | 1.3 ± 0.1                             | 2.2 ± 0.2 | 1.3 ± 0.1 | 0.15 ± 0.02    | 5.1 ± 0.3               | 5/5       | 953.5 ± 65.7  | 188.7 ± 22.8 |
|                     | A0012              | 6.0 ± 0.05 | 1.3 ± 0.1                             | 2.3 ± 0.2 | 1.4 ± 0.1 | 0.11 ± 0.01    | 5.1 ± 0.2               | 5/5       | 1004.4 ± 66.9 | 197.3 ± 22.3 |
|                     | A0016              | 7.5 ± 0.05 | 1.2 ± 0.1                             | 2.3 ± 0.2 | 1.3 ± 0.1 | 0.10 ± 0.01    | 4.9 ± 0.2               | 5/5       | 1017.9 ± 63.5 | 207.7 ± 22.3 |
| Malubai (MAL)       | A0037*             | 1.0 ± 0.05 | 1.3 ± 0.2                             | 2.0 ± 0.2 | 1.2 ± 0.1 | 0.21 ± 0.02    | 4.7 ± 0.2               | 4/4       | 959.0 ± 55.8  | 204.9 ± 22.8 |
|                     | A0037 <sup>#</sup> | 1.0 ± 0.05 | —                                     | —         | —         | —              | 6.0 ± 0.3               | 4/4       | 959.0 ± 55.8  | 158.5 ± 17.0 |
|                     | A0038              | 1.5 ± 0.05 | 1.8 ± 0.2                             | 2.5 ± 0.2 | 1.6 ± 0.1 | 0.20 ± 0.02    | 6.0 ± 0.3               | 3/3       | 1031.5 ± 83.6 | 170.5 ± 22.2 |
|                     | A0040              | 2.4 ± 0.05 | 1.6 ± 0.2                             | 2.5 ± 0.2 | 1.5 ± 0.1 | 0.18 ± 0.02    | 5.7 ± 0.3               | 4/5       | 1111.1 ± 98.6 | 195.0 ± 27.0 |
|                     | A0050              | 5.1 ± 0.05 | 1.6 ± 0.2                             | 2.5 ± 0.2 | 1.6 ± 0.1 | 0.13 ± 0.01    | 5.8 ± 0.3               | 4/5       | 1040.1 ± 91.0 | 179.3 ± 25.0 |

\*Sample A0037 originally (in *italics*) has an unusually low Uranium content (See supplementary Table S4) compared to the rest of the section.

<sup>#</sup>We use the dose rate of the sample below A0037 (here A0038) to evaluate the more likely apparent age of the sample.

Table S3. (a) DSAR and (b) SAR protocol used in the study for  $D_e$  determinations of fine-grained quartz grains (c) pIR<sub>50</sub>IR<sub>290</sub> protocol used for the measurement of polymineral fine grains.

| (a) Double-SAR protocol (Modified from Banerjee et al, 2001) |                              |                  |
|--------------------------------------------------------------|------------------------------|------------------|
| Step                                                         | Treatment                    | Signal measured  |
| 1                                                            | Dose (Natural or laboratory) | -                |
| 2                                                            | Preheat 10s at 260 °C        |                  |
| 3                                                            | IR, 100s at 50°C             |                  |
| 4                                                            | Blue OSL, 40s at 125 °C      | $L_n$ , or $L_x$ |
| 5                                                            | Test dose                    |                  |
| 6                                                            | Cut heat 10s at 240 °C       |                  |
| 7                                                            | IR, 100s at 50°C             |                  |
| 8                                                            | Blue OSL, 40s at 125 °C      | $T_n$ or $T_x$   |
| 9                                                            | Blue OSL, 40s 280 °C         |                  |
| 10                                                           | Return to step 1             |                  |

| (b) SAR protocol (Murray and Wintle, 2000) |                              |                  |
|--------------------------------------------|------------------------------|------------------|
| Step                                       | Treatment                    | Signal measured  |
| 1                                          | Dose (Natural or laboratory) | -                |
| 2                                          | Preheat 10s at 260 °C        |                  |
| 3                                          | Blue OSL, 40s at 125 °C      | $L_n$ , or $L_x$ |
| 4                                          | Test dose                    |                  |
| 5                                          | Cut heat 10s at 240 °C       |                  |
| 6                                          | Blue OSL, 40s at 125 °C      | $T_n$ or $T_x$   |
| 7                                          | Blue OSL, 40s 280 °C         |                  |
| 8                                          | Return to step 1             |                  |

| (c) pIR <sub>50</sub> IR <sub>290</sub> protocol (after Thiel et al, 2011) |                              |                 |
|----------------------------------------------------------------------------|------------------------------|-----------------|
| Step                                                                       | Treatment                    | Signal measured |
| 1                                                                          | Dose (Natural or laboratory) | -               |
| 2                                                                          | Preheat 60s at 320 °C        |                 |
| 3                                                                          | IRSL, 200s at 50°C           |                 |
| 4                                                                          | IRSL, 200s at 290 °C         | $L_n$ or $L_x$  |
| 5                                                                          | Test dose                    |                 |
| 6                                                                          | Preheat 60s at 320 °C        |                 |
| 7                                                                          | IRSL, 200s at 50°C           | $T_n$ or $T_x$  |
| 8                                                                          | IRSL, 200s at 290 °C         |                 |
| 9                                                                          | IRSL, 100s at 325 °C         |                 |
| 10                                                                         | Return to step 1             |                 |

Table S4. Radionuclide activities (Bq.kg<sup>-1</sup>) and daughter to parent ratios obtained from high resolution gamma spectrometry measurements of the <sup>238</sup>U and <sup>232</sup>Th decay chains.

| Sample No. | Depth (m) | <sup>238</sup> U-Chain (Bq.kg <sup>-1</sup> ) |                   |                   | <sup>232</sup> Th Chain (Bq.kg <sup>-1</sup> ) |                   |                   | Ratios - U chain                    |                                      | Ratios - Th                          |                                      |
|------------|-----------|-----------------------------------------------|-------------------|-------------------|------------------------------------------------|-------------------|-------------------|-------------------------------------|--------------------------------------|--------------------------------------|--------------------------------------|
|            |           | <sup>238</sup> U                              | <sup>226</sup> Ra | <sup>210</sup> Pb | <sup>232</sup> Th                              | <sup>228</sup> Ra | <sup>228</sup> Th | <sup>226</sup> Ra/ <sup>238</sup> U | <sup>210</sup> Pb/ <sup>226</sup> Ra | <sup>228</sup> Ra/ <sup>232</sup> Th | <sup>228</sup> Th/ <sup>228</sup> Ra |
| A0017      | 1         | 35 ± 5                                        | 43.5 ± 2.6        | 35 ± 4            | 47.1 ± 2.9                                     | 48 ± 3            | 46.6 ± 2.9        | 1.24                                | 0.80                                 | 1.02                                 | 0.97                                 |
| A0019      | 2         | 34 ± 4                                        | 36.9 ± 2.3        | 32 ± 4            | 42.4 ± 2.5                                     | 40 ± 3            | 43 ± 2.8          | 1.09                                | 0.87                                 | 0.94                                 | 1.08                                 |
| A0021      | 3         | 40 ± 5                                        | 39.5 ± 2.3        | 31 ± 4            | 44.2 ± 2.7                                     | 45 ± 3            | 44 ± 2.8          | 0.99                                | 0.78                                 | 1.02                                 | 0.98                                 |
| A0023      | 4         | 41 ± 5                                        | 39.7 ± 2.5        | 32 ± 4            | 43.2 ± 2.8                                     | 43 ± 3            | 43.3 ± 2.8        | 0.97                                | 0.81                                 | 1.00                                 | 1.01                                 |
| A0025      | 5         | 38 ± 5                                        | 39.5 ± 2.4        | 37 ± 5            | 47 ± 3                                         | 47 ± 3            | 47 ± 3            | 1.04                                | 0.94                                 | 1.00                                 | 1.00                                 |
| A0026      | 0.5       | 29 ± 5                                        | 36.5 ± 2.2        | 28 ± 4            | 40.7 ± 2.6                                     | 42 ± 2.8          | 40.3 ± 2.6        | 1.26                                | 0.77                                 | 1.03                                 | 0.96                                 |
| A0028      | 1.5       | 46 ± 5                                        | 40.5 ± 2.5        | 38 ± 5            | 44.2 ± 2.8                                     | 43 ± 3            | 44.6 ± 2.9        | 0.88                                | 0.94                                 | 0.97                                 | 1.04                                 |
| A0030      | 2.5       | 43 ± 6                                        | 40.3 ± 2.5        | 32 ± 4            | 45.2 ± 2.9                                     | 45 ± 3            | 45.2 ± 2.9        | 0.94                                | 0.79                                 | 1.00                                 | 1.00                                 |
| A0032      | 3.5       | 38 ± 5                                        | 42.3 ± 2.5        | 39 ± 4            | 48 ± 3                                         | 47 ± 3            | 49 ± 3            | 1.11                                | 0.92                                 | 0.98                                 | 1.04                                 |
| A0034      | 4.5       | 40 ± 5                                        | 40.9 ± 2.5        | 33 ± 4            | 46 ± 3                                         | 46 ± 3            | 46 ± 3            | 1.02                                | 0.81                                 | 1.00                                 | 1.00                                 |
| A001       | 0.5       | 29 ± 4                                        | 36.4 ± 2.3        | 30 ± 4            | 41.3 ± 2.6                                     | 42 ± 3            | 41 ± 2.7          | 1.26                                | 0.82                                 | 1.02                                 | 0.98                                 |
| A002       | 1         | 37 ± 5                                        | 44.2 ± 2.6        | 41 ± 5            | 47 ± 2.9                                       | 48 ± 3            | 46.7 ± 2.9        | 1.19                                | 0.93                                 | 1.02                                 | 0.97                                 |
| A003       | 1.5       | 46 ± 5                                        | 40.5 ± 2.4        | 36 ± 4            | 39.5 ± 2.5                                     | 39.1 ± 2.7        | 39.6 ± 2.5        | 0.88                                | 0.89                                 | 0.99                                 | 1.01                                 |
| A007       | 3.5       | 56 ± 5                                        | 50 ± 2.8          | 43 ± 4            | 42.8 ± 2.6                                     | 43 ± 3            | 43 ± 3            | 0.89                                | 0.86                                 | 1.00                                 | 1.00                                 |
| A0012      | 6         | 54 ± 5                                        | 48.1 ± 2.8        | 43 ± 4            | 45.3 ± 2.8                                     | 46 ± 3            | 45.2 ± 2.8        | 0.89                                | 0.89                                 | 1.02                                 | 0.98                                 |
| A0016      | 7.5       | 44 ± 4                                        | 41.2 ± 2.3        | 36 ± 3            | 47.4 ± 2.9                                     | 48 ± 3            | 47.3 ± 2.9        | 0.94                                | 0.87                                 | 1.01                                 | 0.99                                 |
| A0037      | 1         | 59 ± 6                                        | 58 ± 3            | 47 ± 5            | 36.5 ± 2.3                                     | 36.4 ± 2.5        | 36.5 ± 2.3        | 0.98                                | 0.81                                 | 1.00                                 | 1.00                                 |
| A0038      | 1.5       | 97 ± 8                                        | 60 ± 3            | 42 ± 5            | 38.4 ± 2.4                                     | 39 ± 2.6          | 38.3 ± 2.4        | 0.62                                | 0.70                                 | 1.02                                 | 0.98                                 |
| A0040      | 2.4       | 71 ± 8                                        | 62 ± 4            | 53 ± 6            | 45.6 ± 2.9                                     | 46 ± 3            | 45.6 ± 2.9        | 0.87                                | 0.85                                 | 1.01                                 | 0.99                                 |
| A0050      | 5.1       | 75 ± 8                                        | 60 ± 4            | 42 ± 5            | 48 ± 3                                         | 47 ± 3            | 48 ± 3            | 0.80                                | 0.70                                 | 0.98                                 | 1.02                                 |



Table S5. List of sites from the ACA and CLP considered for age depth modelling and consequently for evaluation of MARs. The references in the table refer to the studies from which the luminescence ages for the sites have been obtained.

| Site                                                    | Site names    | Reference                            |
|---------------------------------------------------------|---------------|--------------------------------------|
| <i>Sites from the Ili basin, ACA</i>                    |               |                                      |
| MBK                                                     | Maibulak      | Fitzsimmons et al (2017)             |
| REM                                                     | Remizovka     | This study; Fitzsimmons et al (2018) |
| PAN                                                     | Panfilov      | This study                           |
| ASH                                                     | Ashubulak     | This study                           |
| XEBLK                                                   | Xiaoerbulak   | Li et al (2016)a                     |
| TLD                                                     | Talede        | Kang et al (2015)                    |
| TLD16                                                   | Talede        | Wang et al (2019)a                   |
| NLK                                                     | Nilka         | Song et al (2015)                    |
| ZKT                                                     | Zeketai       | E et al (2012)                       |
| KS15                                                    | Kunes-15      | Li et al (2018)                      |
| KS15-05                                                 | Kunes15-05    | Wang et al (2019)b                   |
| ZSP                                                     | Zhaoso Puma   | Song et al (2012)                    |
| NLT17                                                   | Nalatizhen 17 | Li et al (2020)                      |
| XY17                                                    | Xinyuan 17    | Li et al (2020)                      |
| <i>Sites from basins neighboring the Ili basin, ACA</i> |               |                                      |
| VAL                                                     | Valikhanova   | Fitzsimmons et al (2017)             |
| BSK                                                     | Bishkek       | Youn et al (2014)                    |
| BYH10                                                   | --            | Li et al (2016)b                     |
| LJW10                                                   | Lujiaowan     | Li et al (2015)                      |
| SCZ17                                                   | Shichengzi    | Duan et al (2020)                    |
| YM                                                      | Yumin         | Li et al (2019)                      |
| TC                                                      | Tacheng       | Li et al (2019)                      |
| QS16                                                    | Qingshui      | Li et al (2020)                      |
| <i>Sites from the Chinese loess Plateau</i>             |               |                                      |
| GL                                                      | Gulang        | Sun et al (2012)                     |
| JY                                                      | Jinguan       | Sun et al (2012)                     |
| XF                                                      | Xifeng        | Stevens et al (2016)                 |
| BGY                                                     | Beiguoyuan    | Stevens et al (2008)                 |
| YB                                                      | Yuanbao       | Lai and Wintle (2006)                |
| TXD                                                     | Tuxiangdao    | Buylaert et al (2008)                |
| WN                                                      | Weinan        | Kang et al (2013)                    |
| XY                                                      | Xunyi         | Stevens et al (2008)                 |
| ZJC                                                     | Zhongjiacai   | Buylaert et al (2008)                |
| LC                                                      | Luochuan      | Lu et al (2007)                      |
| MN                                                      | Mangshan      | Qui and Zhou (2015)                  |

## References:

- Avram, A., Constantin, D., Veres, D., Kelemen, S., Obreht, I., Hambach, U., Marković, S. B., & Timar-Gabor, A. (2020). Testing polymineral post-IR IRSL and quartz SAR-OSL protocols on Middle to Late Pleistocene loess at Batajnica, Serbia. *Boreas*, 49(3), 615–633. <https://doi.org/10.1111/bor.12442>
- Banerjee, D., Murray, A. S., Bøtter-Jensen, L., & Lang, A. (2001). Equivalent dose estimation using a single aliquot of polymineral fine grains. *Radiation Measurements*, 33(1), 73–94. doi: 10.1016/S1350-4487(00)00101-3
- Blaauw, M., & Christen, J. A. (2011). Flexible paleoclimate age-depth models using an autoregressive gamma process. *Bayesian Analysis*, 6(3), 457–474. <https://doi.org/10.1214/11-BA618>
- Buylaert, J. P., Murray, A. S., Vandenberghe, D., Vriend, M., Corte, F. D., & haute, P. V. den. (2008). Optical dating of Chinese loess using sand-sized quartz: Establishing a time frame for Late Pleistocene climate changes in the western part of the Chinese Loess Plateau. *Quaternary Geochronology*, 3(1), 99–113. doi: <https://doi.org/10.1016/j.quageo.2007.05.003>
- Buylaert, J.-P., Jain, M., Murray, A. S., Thomsen, K. J., Thiel, C., & Sohbati, R. (2012). A robust feldspar luminescence dating method for Middle and Late Pleistocene sediments. *Boreas*, 41(3), 435–451. doi: <https://doi.org/10.1111/j.1502-3885.2012.00248.x>
- Buylaert, J.-P., Yeo, E.-Y., Thiel, C., Yi, S., Stevens, T., Thompson, W., Frechen, M., Murray, A., & Lu, H. (2015). A detailed post-IR IRSL chronology for the last interglacial soil at the Jingbian loess site (northern China). *Quaternary Geochronology*, 194–199. <https://doi.org/10.1016/j.quageo.2015.02.022>
- Cunningham, A. C., & Wallinga, J. (2010). Selection of integration time intervals for quartz OSL decay curves. *Quaternary Geochronology*, 5(6), 657–666. doi: 10.1016/j.quageo.2010.08.004
- Duan, F., An, C., Wang, W., Herzschuh, U., Zhang, M., Zhang, H., Liu, Y., Zhao, Y., & Li, G. (2020). Dating of a late Quaternary loess section from the northern slope of the Tianshan Mountains (Xinjiang, China) and its paleoenvironmental significance. *Quaternary International*, 544, 104–112. <https://doi.org/10.1016/j.quaint.2020.02.034>
- Duller, G. A. T. (2003). Distinguishing quartz and feldspar in single grain luminescence measurements. *Radiation Measurements*, 37(2), 161–165. [https://doi.org/10.1016/S1350-4487\(02\)00170-1](https://doi.org/10.1016/S1350-4487(02)00170-1)
- Durcan, J. A., King, G. E., & Duller, G. A. T. (2015). DRAC: Dose Rate and Age Calculator for trapped charge dating. *Quaternary Geochronology*, 28, 54–61. doi: 10.1016/j.quageo.2015.03.012
- E. ChongYi, Lai, Z., Sun, Y., Hou, G., Yu, L., & Wu, C. (2012). A luminescence dating study of loess deposits from the Yili River basin in western China. *Quaternary Geochronology*, 10, 50–55. doi: <https://doi.org/10.1016/j.quageo.2012.04.022>

- Fitzsimmons, K. E., Iovita, R., Sprafke, T., Glantz, M., Talamo, S., Horton, K., ... Taimagambetov, Z. (2017). A chronological framework connecting the early Upper Palaeolithic across the Central Asian piedmont. *Journal of Human Evolution*, 113, 107–126. doi: <https://doi.org/10.1016/j.jhevol.2017.07.006>
- Fitzsimmons, K. E., Sprafke, T., Zielhofer, C., Günter, C., Deom, J.-M., Sala, R., & Iovita, R. (2018). Loess accumulation in the Tian Shan piedmont: Implications for palaeoenvironmental change in arid Central Asia. *Aeolian Deposition and Earth Surface Systems*, 469, 30–43. doi: 10.1016/j.quaint.2016.07.041
- Frechen, M., Schweitzer, U., & Zander, A. (1996). Improvements in sample preparation for the fine grain technique. *Ancient TL*, 14(2), 15–17.
- Galbraith, R. F., Roberts, R. G., Laslett, G. M., Yoshida, H., & Olley, J. M. (1999). Optical dating of single and multiple grains of quartz from Jinmium rock shelter, northern Australia: Part I, experimental design and statistical models. *Archaeometry*, 41(2), 339–364. Scopus. doi: 10.1111/j.1475-4754.1999.tb00987.x
- Guérin, G., Mercier, N., & Adamiec, G. (2011). Dose-rate conversion factors: Update. *Ancient TL*, 29(1), 5–8.
- Jackson, M. L., Sayin, M., & Clayton, R. N. (1976). Hexafluorosilicic Acid Reagent Modification for Quartz Isolation. *Soil Science Society of America Journal*, 40(6), 958–960. doi: 10.2136/sssaj1976.03615995004000060040x
- Jain, M., & Singhvi, Ashok. K. (2001). Limits to depletion of blue-green light stimulated luminescence in feldspars: Implications for quartz dating. *Radiation Measurements*, 33(6), 883–892. doi: 10.1016/S1350-4487(01)00104-4
- Kang, S., Wang, X., & Lu, Y. (2013). Quartz OSL chronology and dust accumulation rate changes since the Last Glacial at Weinan on the southeastern Chinese Loess Plateau: Quartz OSL chronology and dust accumulation rates, SE Chinese Loess Plateau. *Boreas*, 815–829. doi: 10.1111/bor.12005
- Kang, S., Wang, X., Lu, Y., Liu, W., Song, Y., & Wang, N. (2015). A high-resolution quartz OSL chronology of the Taldé loess over the past ~30 ka and its implications for dust accumulation in the Ili Basin, Central Asia. *Quaternary Geochronology*, 30, 181–187. doi: 10.1016/j.quageo.2015.04.006
- Jia, J., Liu, H., Gao, F., & Xia, D. (2018). Variations in the westerlies in Central Asia since 16 ka recorded by a loess section from the Tien Shan Mountains. *Palaeogeography, Palaeoclimatology, Palaeoecology*, 504, 156–161. <https://doi.org/10.1016/j.palaeo.2018.05.021>
- Kohfeld, K. E., & Harrison, S. P. (2003). Glacial-interglacial changes in dust deposition on the Chinese Loess Plateau. *Quaternary Science Reviews*, 22(18), 1859–1878. [https://doi.org/10.1016/S0277-3791\(03\)00166-5](https://doi.org/10.1016/S0277-3791(03)00166-5)

Lai, Z.-P., & Wintle, A. G. (2006). Locating the boundary between the Pleistocene and the Holocene in Chinese loess using luminescence. *The Holocene*, 16(6), 893–899. doi: 10.1191/0959683606hol980rr

Li, G., Wen, L., Xia, D., Duan, Y., Rao, Z., Madsen, D. B., Wei, H., Li, F., Jia, J., & Chen, F. (2015). Quartz OSL and K-feldspar pIRIR dating of a loess/paleosol sequence from arid central Asia, Tianshan Mountains, NW China. *Quaternary Geochronology*, 28, 40–53. Scopus. <https://doi.org/10.1016/j.quageo.2015.03.011>

Li, Y., Song, Y., Lai, Z., Han, L., & An, Z. (2016)a. Rapid and cyclic dust accumulation during MIS 2 in Central Asia inferred from loess OSL dating and grain-size analysis. *Scientific Reports*, 6(1), 32365. doi: 10.1038/srep32365

Li, G., Rao, Z., Duan, Y., Xia, D., Wang, L., Madsen, D. B., Jia, J., Wei, H., Qiang, M., Chen, J., & Chen, F. (2016)b. Paleoenvironmental changes recorded in a luminescence dated loess/paleosol sequence from the Tianshan Mountains, arid central Asia, since the Penultimate Glaciation. *Earth and Planetary Science Letters*, 448, 1–12. <https://doi.org/10.1016/j.epsl.2016.05.008>

Li, G., Chen, F., Xia, D., Yang, H., Zhang, X., Madsen, D., Oldknow, C., Wei, H., Rao, Z., & Qiang, M. (2018). A Tianshan Mountains loess-paleosol sequence indicates anti-phase climatic variations in arid central Asia and in East Asia. *Earth and Planetary Science Letters*, 494, 153–163. <https://doi.org/10.1016/j.epsl.2018.04.052>

Li, Y., Song, Y., Yin, Q., Han, L., & Wang, Y. (2019). Orbital and millennial northern mid-latitude westerlies over the last glacial period. *Climate Dynamics*, 53(5–6), 3315–3324. doi: 10.1007/s00382-019-04704-5

Li, G., Yang, H., Stevens, T., Zhang, X., Zhang, H., Wei, H., Zheng, W., Li, L., Liu, X., Chen, J., Xia, D., Oldknow, C., Ye, W., & Chen, F. (2020). Differential ice volume and orbital modulation of Quaternary moisture patterns between Central and East Asia. *Earth and Planetary Science Letters*, 530, 115901. <https://doi.org/10.1016/j.epsl.2019.115901>

Lu, Y. C., Wang, X. L., & Wintle, A. G. (2007). A new OSL chronology for dust accumulation in the last 130,000 yr for the Chinese Loess Plateau. *Quaternary Research*, 67(1), 152–160. doi: 10.1016/j.yqres.2006.08.003

Murray, A. S., & Wintle, A. G. (2000). Luminescence dating of quartz using an improved single-aliquot regenerative-dose protocol. *Radiation Measurements*, 32(1), 57–73. [https://doi.org/10.1016/S1350-4487\(99\)00253-X](https://doi.org/10.1016/S1350-4487(99)00253-X)

Murray, A. S., & Wintle, A. G. (2003). The single aliquot regenerative dose protocol: Potential for improvements in reliability. *Radiation Measurements*, 37(4), 377–381. [https://doi.org/10.1016/S1350-4487\(03\)00053-2](https://doi.org/10.1016/S1350-4487(03)00053-2)

- Murray, A. S., Buylaert, J. P., Thomsen, K. J., & Jain, M. (2009). The effect of preheating on the IRSL signal from feldspar. *Radiation Measurements*, 44(5), 554–559. <https://doi.org/10.1016/j.radmeas.2009.02.004>
- Olley, J. M., Murray, A., & Roberts, R. G. (1996). The effects of disequilibria in the uranium and thorium decay chains on burial dose rates in fluvial sediments. *Quaternary Science Reviews*, 15(7), 751–760. doi: 10.1016/0277-3791(96)00026-1
- Prescott, J. R., & Hutton, J. T. (1994). Cosmic ray contributions to dose rates for luminescence and ESR dating: Large depths and long-term time variations. *Radiation Measurements*, 23(2), 497–500. doi: 10.1016/1350-4487(94)90086-8
- Qiu, F., & Zhou, L. (2015). A new luminescence chronology for the Mangshan loess-palaeosol sequence on the southern bank of the Yellow River in Henan, central China. *Quaternary Geochronology*, 30, 24–33. doi: 10.1016/j.quageo.2015.06.014
- Rees-Jones, J. (1995). Optical dating of young sediments using fine-grained quartz. *Ancient TL*, 13, 9–14.
- Roberts, H. M., & Wintle, A. G. (2001). Equivalent dose determinations for polymineralic fine-grains using the SAR protocol: Application to a Holocene sequence of the Chinese Loess Plateau. *Quaternary Science Reviews*, 20(5), 859–863. doi: 10.1016/S0277-3791(00)00051-2
- Song, YouGui, Lai, Z., Li, Y., Chen, T., & Wang, Y. (2015). Comparison between luminescence and radiocarbon dating of late Quaternary loess from the Ili Basin in Central Asia. *Quaternary Geochronology*, 30, 405–410. doi: 10.1016/j.quageo.2015.01.012
- Song, Yougui, Li, C., Zhao, J., Cheng, P., & Zeng, M. (2012). A combined luminescence and radiocarbon dating study of the Ili loess, Central Asia. *13th International Conference on Luminescence and Electron Spin Resonance Dating - LED 2011 Dedicated to J. Prescott and G. Berger*, 10, 2–7. doi: 10.1016/j.quageo.2012.04.005
- Stevens, T., Buylaert, J.-P., Lu, H., Thiel, C., Murray, A., Frechen, M., ... Zeng, L. (2016). Mass accumulation rate and monsoon records from Xifeng, Chinese Loess Plateau, based on a luminescence age model: Monsoon Records from Chinese Loess Plateau. *Journal of Quaternary Science*, 31(4), 391–405. doi: 10.1002/jqs.2848
- Stevens, T., Lu, H., Thomas, D. S. G., & Armitage, S. J. (2008). Optical dating of abrupt shifts in the late Pleistocene East Asian monsoon. *Geology*, 36(5), 415. doi: 10.1130/G24524A.1
- Sun, Y., Clemens, S. C., Morrill, C., Lin, X., Wang, X., & An, Z. (2012). Influence of Atlantic meridional overturning circulation on the East Asian winter monsoon. *Nature Geoscience*, 5(1), 46–49. doi: 10.1038/ngeo1326
- Thomsen, K. J., Bøtter-Jensen, L., Denby, P. M., Moska, P., & Murray, A. S. (2006). Developments in luminescence measurement techniques. *Radiation Measurements*, 41(7), 768–773. doi: 10.1016/j.radmeas.2006.06.010

- Thomsen, K. J., Murray, A. S., Jain, M., & Bøtter-Jensen, L. (2008). Laboratory fading rates of various luminescence signals from feldspar-rich sediment extracts. *Radiation Measurements*, 43(9), 1474–1486. <https://doi.org/10.1016/j.radmeas.2008.06.002>
- Timar-Gabor, A., Buylaert, J.-P., Guralnik, B., Trandafir-Antohei, O., Constantin, D., Anechitei-Deacu, V., Jain, M., Murray, A. S., Porat, N., Hao, Q., & Wintle, A. G. (2017). *Radiation Measurements*, 106, 464–471. <https://doi.org/10.1016/j.radmeas.2017.01.009>
- Wang, L., Jia, J., Zhao, H., Liu, H., Duan, Y., Xie, H., Zhang, D. D., & Chen, F. (2019)a. Optical dating of Holocene paleosol development and climate changes in the Yili Basin, arid central Asia. *The Holocene*, 29(6), 1068–1077. <https://doi.org/10.1177/0959683619831432>
- Wang, L., Jia, J., Xia, D., Liu, H., Gao, F., Duan, Y., Wang, Q., Xie, H., & Chen, F. (2019)b. Climate change in arid central Asia since MIS 2 revealed from a loess sequence in Yili Basin, Xinjiang, China. *Quaternary International*, 502, 258–266. <https://doi.org/10.1016/j.quaint.2018.02.032>
- Wintle, A. G., & Murray, A. S. (2006). A review of quartz optically stimulated luminescence characteristics and their relevance in single-aliquot regeneration dating protocols. *Radiation Measurements*, 41(4), 369–391. doi: 10.1016/j.radmeas.2005.11.001
- Youn, J. H., Seong, Y. B., Choi, J. H., Abdrakhmatov, K., & Ormukov, C. (2014). Loess deposits in the northern Kyrgyz Tien Shan: Implications for the paleoclimate reconstruction during the Late Quaternary. *Catena*, 117, 81–93. doi: <https://doi.org/10.1016/j.catena.2013.09.007>
- Zhang, J. F., & Zhou, L. P. (2007). Optimization of the ‘double SAR’ procedure for polymineral fine grains. *Radiation Measurements*, 42(9), 1475–1482. doi: 10.1016/j.radmeas.2007.06.007
- Zhang, J.-F., Fan, C.-F., Wang, H., & Zhou, L.-P. (2007). Chronology of an oyster reef on the coast of Bohai Bay, China: Constraints from optical dating using different luminescence signals from fine quartz and polymineral fine grains of coastal sediments. *Quaternary Geochronology*, 2(1), 71–76. doi: 10.1016/j.quageo.2006.05.027
